# Supplementary material for: Combined effects of cotyledon excision and nursery fertilization on root growth, nutrient status and outplanting performance of Quercus variabilis container seedlings
Source: PubMed Central journal article supplement (PMC5436658; doi:10.1371/journal.pone.0177002), 2017-05-18

**S1 Fig.** The mean absolute emergence rate (first derivative for Richards growth function, % new seedlings day<sup>-1</sup>) of *Quercus variabilis* seedlings. This figure corresponds to Fig 2, but intuitively showed the rapid emergence period of *Q. variabilis*.

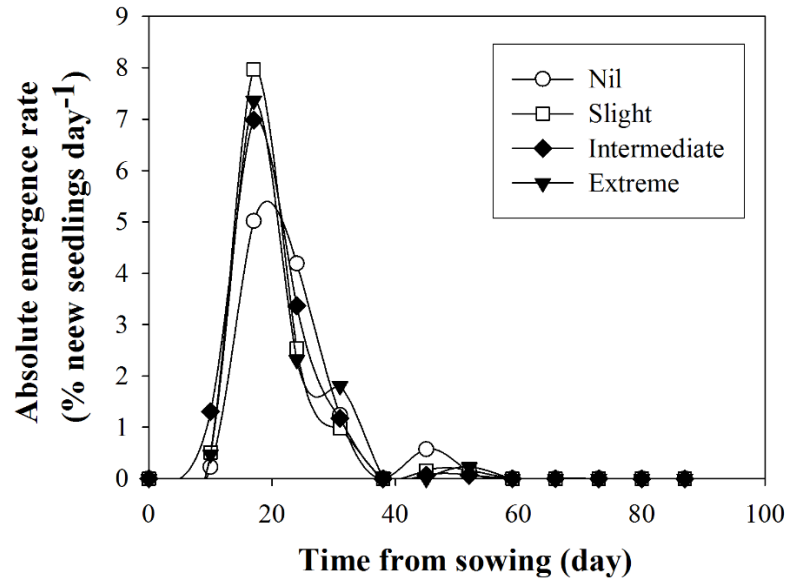

Supplement: pone.0177002.s001.pdf [file pone.0177002.s001.pdf]
