# Supplementary material for: Combined effects of cotyledon excision and nursery fertilization on root growth, nutrient status and outplanting performance of Quercus variabilis container seedlings
Source: PubMed Central journal article supplement (PMC5436658; doi:10.1371/journal.pone.0177002), 2017-05-18
Supplement: pone.0177002.s003.pdf [file pone.0177002.s003.pdf]

**S2 Table. Initial data for the amount of seedling emergence.** Thirty acorns with different intensities of excision were sown in each try and a total of 450 acorns were initially employed for each excision treatment. This table corresponds to Fig 2A, but partitioned into replications.

| Excision treatments | Trays        | Time schedule for seedling emergence recording |           |          |            |            |           |          |           |           | total      |
|---------------------|--------------|------------------------------------------------|-----------|----------|------------|------------|-----------|----------|-----------|-----------|------------|
|                     |              | 2.26./0 d                                      | 2.29./3 d | 3.6./10d | 3.13./17d  | 3.20./24d  | 3.27./31d | 4.2./38d | 4.9./45d  | 4.16./52d |            |
| Nil                 | 1            | Sowing                                         | 0         | 0        | 10         | 8          | 3         | 0        | 2         | 0         | 23         |
| Nil                 | 2            | Sowing                                         | 0         | 0        | 10         | 9          | 3         | 0        | 1         | 0         | 23         |
| Nil                 | 3            | Sowing                                         | 0         | 1        | 13         | 9          | 2         | 0        | 2         | 0         | 27         |
| Nil                 | 4            | Sowing                                         | 0         | 0        | 10         | 9          | 3         | 0        | 0         | 0         | 22         |
| Nil                 | 5            | Sowing                                         | 0         | 1        | 10         | 9          | 2         | 0        | 1         | 1         | 24         |
| Nil                 | 6            | Sowing                                         | 0         | 0        | 10         | 9          | 3         | 0        | 1         | 0         | 23         |
| Nil                 | 7            | Sowing                                         | 0         | 1        | 13         | 9          | 3         | 0        | 0         | 0         | 26         |
| Nil                 | 8            | Sowing                                         | 0         | 1        | 10         | 9          | 2         | 0        | 1         | 1         | 24         |
| Nil                 | 9            | Sowing                                         | 0         | 0        | 10         | 9          | 3         | 0        | 1         | 0         | 23         |
| Nil                 | 10           | Sowing                                         | 0         | 0        | 10         | 7          | 3         | 0        | 2         | 1         | 23         |
| Nil                 | 11           | Sowing                                         | 0         | 1        | 10         | 9          | 2         | 0        | 1         | 0         | 23         |
| Nil                 | 12           | Sowing                                         | 0         | 1        | 12         | 9          | 3         | 0        | 0         | 1         | 26         |
| Nil                 | 13           | Sowing                                         | 0         | 0        | 10         | 9          | 3         | 0        | 3         | 0         | 25         |
| Nil                 | 14           | Sowing                                         | 0         | 1        | 10         | 9          | 2         | 0        | 2         | 0         | 24         |
| Nil                 | 15           | Sowing                                         | 0         | 0        | 10         | 9          | 2         | 0        | 1         | 0         | 22         |
| Nil                 | <b>total</b> | /                                              | <b>0</b>  | <b>7</b> | <b>158</b> | <b>132</b> | <b>39</b> | <b>0</b> | <b>18</b> | <b>4</b>  | <b>358</b> |
| Slight              | 1            | Sowing                                         | 0         | 0        | 13         | 5          | 1         | 0        | 0         | 0         | 19         |
| Slight              | 2            | Sowing                                         | 0         | 0        | 17         | 5          | 2         | 0        | 1         | 0         | 25         |
| Slight              | 3            | Sowing                                         | 0         | 1        | 15         | 6          | 2         | 0        | 0         | 0         | 24         |
| Slight              | 4            | Sowing                                         | 0         | 1        | 17         | 6          | 2         | 2        | 1         | 0         | 29         |

|                     |              |          |          |           |            |           |           |          |          |          |            |
|---------------------|--------------|----------|----------|-----------|------------|-----------|-----------|----------|----------|----------|------------|
| <b>Slight</b>       | 5            | Sowing   | 0        | 1         | 16         | 5         | 0         | 0        | 2        | 0        | 24         |
| <b>Slight</b>       | 6            | Sowing   | 0        | 2         | 17         | 8         | 2         | 1        | 0        | 0        | 30         |
| <b>Slight</b>       | 7            | Sowing   | 0        | 1         | 14         | 6         | 4         | 0        | 1        | 0        | 26         |
| <b>Slight</b>       | 8            | Sowing   | 0        | 2         | 17         | 5         | 2         | 1        | 0        | 0        | 27         |
| <b>Slight</b>       | 9            | Sowing   | 0        | 1         | 17         | 6         | 2         | 0        | 0        | 0        | 26         |
| <b>Slight</b>       | 10           | Sowing   | 0        | 1         | 15         | 6         | 6         | 0        | 0        | 0        | 28         |
| <b>Slight</b>       | 11           | Sowing   | 0        | 2         | 19         | 3         | 2         | 1        | 0        | 0        | 27         |
| <b>Slight</b>       | 12           | Sowing   | 0        | 1         | 18         | 5         | 3         | 0        | 0        | 0        | 27         |
| <b>Slight</b>       | 13           | Sowing   | 0        | 2         | 17         | 5         | 1         | 0        | 0        | 0        | 25         |
| <b>Slight</b>       | 14           | Sowing   | 0        | 0         | 20         | 4         | 0         | 0        | 0        | 0        | 24         |
| <b>Slight</b>       | 15           | Sowing   | 0        | 1         | 17         | 5         | 2         | 0        | 0        | 0        | 25         |
| <b>Slight</b>       | <b>total</b> | <b>/</b> | <b>0</b> | <b>16</b> | <b>249</b> | <b>80</b> | <b>31</b> | <b>5</b> | <b>5</b> | <b>0</b> | <b>386</b> |
| <b>Intermediate</b> | 1            | Sowing   | 0        | 2         | 14         | 7         | 4         | 0        | 0        | 0        | 27         |
| <b>Intermediate</b> | 2            | Sowing   | 0        | 3         | 14         | 6         | 3         | 0        | 0        | 0        | 26         |
| <b>Intermediate</b> | 3            | Sowing   | 0        | 5         | 15         | 7         | 2         | 0        | 0        | 0        | 29         |
| <b>Intermediate</b> | 4            | Sowing   | 0        | 3         | 14         | 8         | 0         | 1        | 0        | 0        | 26         |
| <b>Intermediate</b> | 5            | Sowing   | 0        | 1         | 17         | 7         | 3         | 0        | 0        | 0        | 28         |
| <b>Intermediate</b> | 6            | Sowing   | 0        | 0         | 14         | 7         | 2         | 0        | 0        | 0        | 23         |
| <b>Intermediate</b> | 7            | Sowing   | 0        | 3         | 15         | 5         | 2         | 0        | 1        | 0        | 26         |
| <b>Intermediate</b> | 8            | Sowing   | 0        | 4         | 16         | 7         | 1         | 1        | 0        | 0        | 29         |
| <b>Intermediate</b> | 9            | Sowing   | 0        | 2         | 14         | 8         | 3         | 0        | 0        | 0        | 27         |
| <b>Intermediate</b> | 10           | Sowing   | 0        | 3         | 17         | 7         | 2         | 0        | 0        | 0        | 29         |
| <b>Intermediate</b> | 11           | Sowing   | 0        | 4         | 14         | 9         | 3         | 0        | 0        | 0        | 30         |
| <b>Intermediate</b> | 12           | Sowing   | 0        | 2         | 13         | 8         | 2         | 0        | 0        | 0        | 25         |
| <b>Intermediate</b> | 13           | Sowing   | 0        | 4         | 16         | 7         | 2         | 0        | 1        | 0        | 30         |

|                     |              |        |          |           |            |            |           |          |          |          |            |
|---------------------|--------------|--------|----------|-----------|------------|------------|-----------|----------|----------|----------|------------|
| <b>Intermediate</b> | 14           | Sowing | 0        | 3         | 13         | 6          | 5         | 0        | 0        | 0        | 27         |
| <b>Intermediate</b> | 15           | Sowing | 0        | 2         | 14         | 7          | 3         | 0        | 0        | 0        | 26         |
| <b>Intermediate</b> | <b>total</b> | /      | <b>0</b> | <b>41</b> | <b>220</b> | <b>106</b> | <b>37</b> | <b>2</b> | <b>2</b> | <b>0</b> | <b>408</b> |
| <b>Extreme</b>      | 1            | Sowing | 0        | 2         | 12         | 4          | 4         | 0        | 0        | 0        | 22         |
| <b>Extreme</b>      | 2            | Sowing | 0        | 1         | 18         | 5          | 3         | 0        | 1        | 0        | 28         |
| <b>Extreme</b>      | 3            | Sowing | 0        | 1         | 16         | 2          | 5         | 1        | 0        | 0        | 25         |
| <b>Extreme</b>      | 4            | Sowing | 0        | 1         | 12         | 5          | 4         | 0        | 1        | 0        | 23         |
| <b>Extreme</b>      | 5            | Sowing | 0        | 0         | 17         | 5          | 4         | 0        | 0        | 0        | 26         |
| <b>Extreme</b>      | 6            | Sowing | 0        | 1         | 17         | 4          | 5         | 0        | 0        | 0        | 27         |
| <b>Extreme</b>      | 7            | Sowing | 0        | 1         | 13         | 5          | 4         | 0        | 0        | 0        | 23         |
| <b>Extreme</b>      | 8            | Sowing | 0        | 3         | 11         | 5          | 4         | 0        | 1        | 0        | 24         |
| <b>Extreme</b>      | 9            | Sowing | 0        | 1         | 14         | 6          | 2         | 0        | 0        | 0        | 23         |
| <b>Extreme</b>      | 10           | Sowing | 0        | 0         | 17         | 4          | 5         | 0        | 1        | 0        | 27         |
| <b>Extreme</b>      | 11           | Sowing | 0        | 1         | 18         | 5          | 4         | 0        | 1        | 0        | 29         |
| <b>Extreme</b>      | 12           | Sowing | 0        | 0         | 16         | 5          | 4         | 0        | 0        | 0        | 25         |
| <b>Extreme</b>      | 13           | Sowing | 0        | 1         | 17         | 7          | 3         | 0        | 1        | 0        | 29         |
| <b>Extreme</b>      | 14           | Sowing | 0        | 2         | 17         | 5          | 4         | 0        | 0        | 0        | 28         |
| <b>Extreme</b>      | 15           | Sowing | 0        | 0         | 17         | 6          | 2         | 0        | 1        | 0        | 26         |
| <b>Extreme</b>      | <b>total</b> | /      | <b>0</b> | <b>15</b> | <b>232</b> | <b>73</b>  | <b>57</b> | <b>1</b> | <b>7</b> | <b>0</b> | <b>385</b> |
