# Supplementary material for: Combined effects of cotyledon excision and nursery fertilization on root growth, nutrient status and outplanting performance of Quercus variabilis container seedlings
Source: PubMed Central journal article supplement (PMC5436658; doi:10.1371/journal.pone.0177002), 2017-05-18
Supplement: pone.0177002.s004.pdf [file pone.0177002.s004.pdf]

**S3 Table. The mean root surface area (cm<sup>2</sup>) for different root lasses and the mean proportion (%) of taproot to total root surface area.**

| <b>Cotyledon excision</b> | <b>Nursery fertilization</b> | <b>Lateral and fibrous root surface area (cm<sup>2</sup>)</b> | <b>Taproot surface area (cm<sup>2</sup>)</b> | <b>Total root surface area (cm<sup>2</sup>)</b> | <b>Proportion of taproot (%)</b> |
|---------------------------|------------------------------|---------------------------------------------------------------|----------------------------------------------|-------------------------------------------------|----------------------------------|
| <b>Nil</b>                | <b>Low NF</b>                | 28.38                                                         | 55.56                                        | 83.94                                           | 66                               |
| <b>Slight</b>             | <b>Low NF</b>                | 37.39                                                         | 58.40                                        | 95.79                                           | 61                               |
| <b>Intermediate</b>       | <b>Low NF</b>                | 32.83                                                         | 58.79                                        | 91.62                                           | 64                               |
| <b>Extreme</b>            | <b>Low NF</b>                | 23.23                                                         | 48.55                                        | 71.78                                           | 68                               |
| <b>Nil</b>                | <b>High NF</b>               | 43.42                                                         | 77.98                                        | 121.40                                          | 64                               |
| <b>Slight</b>             | <b>High NF</b>               | 30.01                                                         | 51.14                                        | 81.15                                           | 63                               |
| <b>Intermediate</b>       | <b>High NF</b>               | 34.41                                                         | 64.59                                        | 99.00                                           | 65                               |
| <b>Extreme</b>            | <b>High NF</b>               | 30.83                                                         | 60.90                                        | 91.73                                           | 66                               |
